# Supplementary material for: Synthesis of Fe2+ Substituted High-Performance LiMn1−xFexPO4/C (x = 0, 0.1, 0.2, 0.3, 0.4) Cathode Materials for Lithium-Ion Batteries via Sol-Gel Processes
Source: MDPI journal article supplement (doi:10.3390/molecules26247641), 2021-12-16
Supplement: s1 [file s1]

# Synthesis of Fe<sup>2+</sup> Substituted High-Performance LiMn<sub>1-x</sub>Fe<sub>x</sub>PO<sub>4</sub>/C (x = 0, 0.1, 0.2, 0.3, 0.4) Cathode Materials for Lithium-Ion Batteries via Sol-Gel Processes

Kaibin Fang <sup>1</sup>, Jihua Zhu <sup>2</sup>, Qian Xie <sup>1</sup>, Yifei Men <sup>1</sup>, Wei Yang <sup>1,\*</sup>, Junpeng Li <sup>3,\*</sup> and Xinwei Yu <sup>1</sup>

<sup>1</sup> School of Chemistry and Chemical Engineering, Guangzhou University, Guangzhou 510006, China; kbfang608@gmail.com (K.F.); xieqian018@gmail.com (Q.X.); menyifei2000@163.com (Y.M.); yxw-gzdx@163.com (X.Y.)

<sup>2</sup> Zhuhai CosMX Battery Co., Ltd., Zhuhai 519180, China; zhujh125@126.com

<sup>3</sup> School of Chemical Engineering and Technology, Guangdong Industry Polytechnic, Guangzhou 510300, China

\* Correspondence: wyang@gzhu.edu.cn (W.Y.); 2006112030@gdip.edu.cn (J.L.); Tel: +86-13719030050; +86-15918790616 (J.L.)

**Table S1.** C contents of the LiMn<sub>1-x</sub>Fe<sub>x</sub>PO<sub>4</sub>/C.

| Sample                                                   | C wt% |
|----------------------------------------------------------|-------|
| LiMnPO <sub>4</sub> /C                                   | 7.23  |
| LiMn <sub>0.9</sub> Fe <sub>0.1</sub> PO <sub>4</sub> /C | 7.21  |
| LiMn <sub>0.8</sub> Fe <sub>0.2</sub> PO <sub>4</sub> /C | 7.16  |
| LiMn <sub>0.7</sub> Fe <sub>0.3</sub> PO <sub>4</sub> /C | 7.28  |
| LiMn <sub>0.6</sub> Fe <sub>0.4</sub> PO <sub>4</sub> /C | 7.24  |

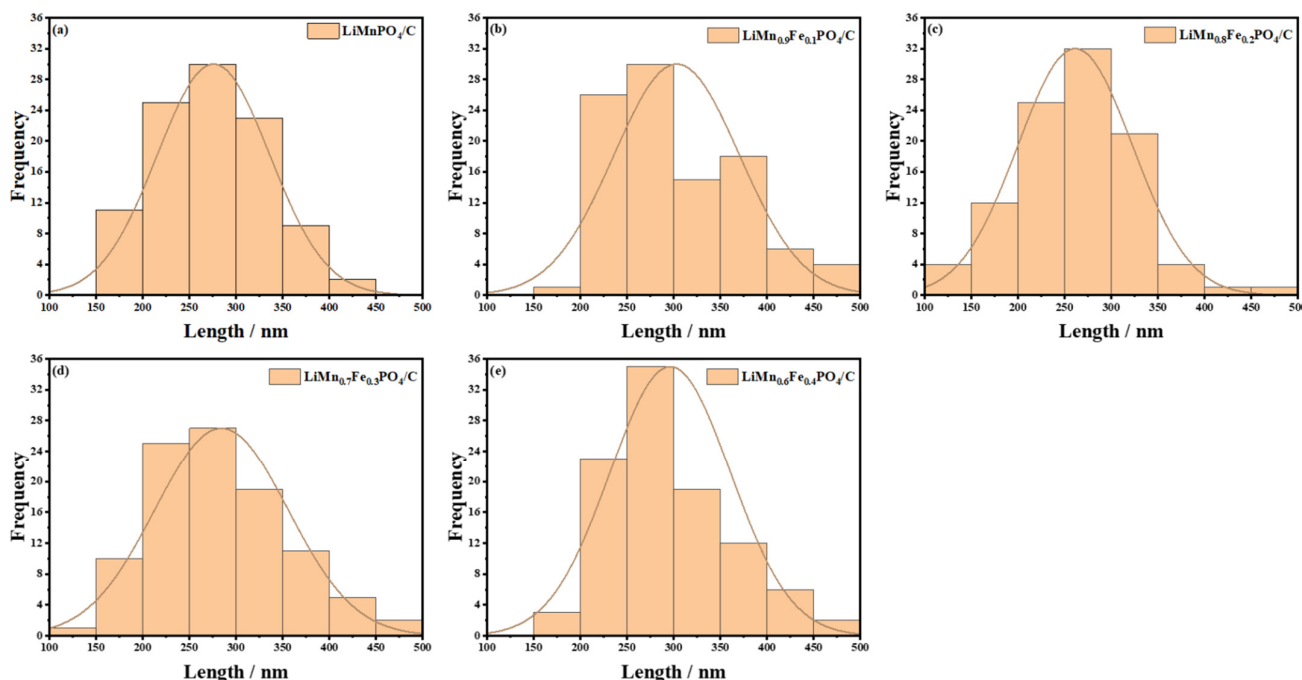

**Figure S1.** The statistics of particle size distribution of LiMn<sub>1-x</sub>Fe<sub>x</sub>PO<sub>4</sub>/C (0 ≤ x ≤ 0.4) samples; (a) LiMnPO<sub>4</sub>/C (based on SEM image (a)); (b) LiMn<sub>0.9</sub>Fe<sub>0.1</sub>PO<sub>4</sub>/C (based on SEM image (b)); (c) LiMn<sub>0.8</sub>Fe<sub>0.2</sub>PO<sub>4</sub>/C (based on SEM image (c)); (d) LiMn<sub>0.7</sub>Fe<sub>0.3</sub>PO<sub>4</sub>/C (based on SEM image (d)); (e) LiMn<sub>0.6</sub>Fe<sub>0.4</sub>PO<sub>4</sub>/C (based on SEM image (e)).
